# Supplementary material for: Multilevel Analysis of the Association of Dental-Hygienist-Related Factors on Regular Dental Check-Up Behavior
Source: Int J Environ Res Public Health. 2021 Mar 10;18(6):2816. doi: 10.3390/ijerph18062816 (PMC7998093; doi:10.3390/ijerph18062816)
Supplement: Supplementary file 1 [file ijerph-18-02816-s001.zip › ijerph-1118612_supplementfigure.pdf]

Supplemental Figure S1 .The survey questionnaire was translated into English.

Dental Health Examination Form

DATE :                      year                      month                      day

Patient name \_\_\_\_\_

Dentition status

|   |   |   |   |   |   |   |   |   |  |   |   |   |   |   |   |   |   |   |
|---|---|---|---|---|---|---|---|---|--|---|---|---|---|---|---|---|---|---|
| R | 8 | 7 | 6 | 5 | 4 | 3 | 2 | 1 |  | 1 | 2 | 3 | 4 | 5 | 6 | 7 | 8 | L |
|   | 8 | 7 | 6 | 5 | 4 | 3 | 2 | 1 |  | 1 | 2 | 3 | 4 | 5 | 6 | 7 | 8 |   |

|                                 |                         |                                 |                           |                                                       |                                           |
|---------------------------------|-------------------------|---------------------------------|---------------------------|-------------------------------------------------------|-------------------------------------------|
| The number of healthy teeth (/) | The number of caries(C) | The number of filling teeth(○ ) | The number of teeth (sum) | The number of missing and need to treatment teeth(△ ) | The number of fixed dental prosthesis(◎ ) |
|                                 |                         |                                 |                           |                                                       |                                           |

【CPI improved】

|     |    |    |    |    |    |    |    |    |    |    |    |    |    |    |    |    |
|-----|----|----|----|----|----|----|----|----|----|----|----|----|----|----|----|----|
|     | 18 | 17 | 16 | 15 | 14 | 13 | 12 | 11 | 21 | 22 | 23 | 24 | 25 | 26 | 27 | 28 |
| BOP |    |    |    |    |    |    |    |    |    |    |    |    |    |    |    |    |
| PPD |    |    |    |    |    |    |    |    |    |    |    |    |    |    |    |    |
| BOP |    |    |    |    |    |    |    |    |    |    |    |    |    |    |    |    |
| PPD |    |    |    |    |    |    |    |    |    |    |    |    |    |    |    |    |
|     | 48 | 47 | 46 | 45 | 44 | 43 | 42 | 41 | 31 | 32 | 33 | 34 | 35 | 36 | 37 | 38 |

Description of CPI Improved Code  
Bleeding column:  
None = 0, Yes = 1, Not measurable = 9, Loss of tooth = X  
Periodontal pocket (PD) column  
None = 0, PD 4-5 mm = 1, PD 6 mm or more = 2, Not measurable = 9, Tooth loss = X

|                 |       |    |       |
|-----------------|-------|----|-------|
| Attachment loss | 17/16 | 11 | 26/27 |
|                 |       |    |       |
|                 | 47/46 | 31 | 36/37 |
|                 |       |    |       |

Attachment loss  
In the depth of the pocket from the cement enamel border  
0 to 3 mm = 0   ·   4 to 5 mm = 1   ·   6 to 8 mm = 2  
9 to 11mm = 3   ·   12mm or more = 4  
Unmeasurable = 9   ·   Tooth loss = X

## Questionnaire for dental Clinics

DATE : \_\_\_\_\_ year \_\_\_\_\_ month \_\_\_\_\_ day

### The name of dental clinics

**Q 1 . Please fill the address your dental clinic.**

Zip code \_\_\_\_\_

**Q2: Please write the gender of the director of your clinic.**

1. Male                      2. Female

**Q3. Please write the age of the director of your clinic.**

\_\_\_\_\_ Years old

**Q4. Please circle all that apply to your clinic's advocated department.**

1. Dentistry    2. Pedodontics    3. Orthodontics    4. Dental surgery

**Q5. Please write the number of examination tables (units) and the number of dental units dedicated for dental hygienists in your clinic.**

Number of units \_\_\_\_\_ units

(Of these, the number of dental units dedicated to dental hygienists) \_\_\_\_\_ units

**Q6. Please write the number of patients on the day you filled out this questionnaire.**

①Number of first-time patients \_\_\_\_\_ people

②Number of follow-up patients \_\_\_\_\_ people

**Q 7 .Please write the number of full-time and part-time staff in your clinic.**

(If you have no staff, please write "0".)

|                             | Full-time           | Part-time           |                                |
|-----------------------------|---------------------|---------------------|--------------------------------|
|                             | The number of staff | The number of staff | Number of full-time equivalent |
| Dentist(including yourself) | people              | people              | people                         |
| Dental hygienist            | people              | people              | people                         |
| Dental technician           | people              | people              | people                         |
| Dental assistant            | people              | people              | people                         |
| Others                      | people              | people              | people                         |

※The number of part-time workers should be calculated on a full-time basis (see the table below).

**【Example】**                      In the case of a 5-day work week at your hospital  
If you work all day 5 days a week:  $5/5 \times 1 = 1$  person  
If you work one full day per week:  $1/5 \times 1 = 0.2$   
Half-day work 5 days a week:  $5/5 \times 0.5 = 0.5$

**Q8: In the past month, did you provide any of the following preventive dental care services?** (Please circle one for each item)

|                                                   | 1<br>Yes | 2<br>No |
|---------------------------------------------------|----------|---------|
| Fluoride applications                             | 1        | 2       |
| Fluoride mouthwash                                | 1        | 2       |
| Sealant                                           | 1        | 2       |
| Prevention and control                            | 1        | 2       |
| Of which, continuous control for more than 1 year | 1        | 2       |

**Q9. Have you had a regular checkup in the past month? (Circle one)**

1.Yes → Go to Q9-1      2.No → Go to Q10

**【If you answered "1.Yes" to Q9, please answer.】**

**Q9-1. How often do you provide treatment and instructions to adults during regular dental checkups for each item? (Circle one for each item)**

|                                                               |                      | 1<br>Always every time | 2<br>Often | 3<br>Not very seldom. | 4<br>Not at all |
|---------------------------------------------------------------|----------------------|------------------------|------------|-----------------------|-----------------|
| Oral examination                                              | Tooth (caries, etc.) | 1                      | 2          | 3                     | 4               |
|                                                               | Periodontal          | 1                      | 2          | 3                     | 4               |
| Tooth scaling.                                                | Supragingival        | 1                      | 2          | 3                     | 4               |
|                                                               | Subgingival          | 1                      | 2          | 3                     | 4               |
| Tooth cleaning                                                |                      | 1                      | 2          | 3                     | 4               |
| Fluoride application                                          |                      | 1                      | 2          | 3                     | 4               |
| Fluoride mouthwash instruction                                |                      | 1                      | 2          | 3                     | 4               |
| Oral health instruction<br>(Tooth brushing instruction, etc.) |                      | 1                      | 2          | 3                     | 4               |
| Dietary instruction                                           |                      | 1                      | 2          | 3                     | 4               |
| Smoking cessation instructions                                |                      | 1                      | 2          | 3                     | 4               |
| Other ( )                                                     |                      | 1                      | 2          | 3                     | 4               |

**Q10: Have you provided dental health instructions in the past month? (Circle one)**

1. Yes, I did → Go to Q10-1      2. No, I did not → End of question

**Q10-1. How much time do you spend on average for each oral health instruction for each patient? Please give us a rough estimate. (Circle one)**

1. Less than 5 minutes      2. 5 to 9 minutes      3. 10 to 19 minutes  
4. 20 to 29 minutes      5. 30 minutes or more      6. Don't know

**Thank you for your cooperation.**

## Patient Questionnaire

**DATE :** \_\_\_\_\_ year \_\_\_\_\_ month \_\_\_\_\_ day

**Patient name** \_\_\_\_\_

**Sex(Male • Female)** \_\_\_\_\_

**Age** \_\_\_\_\_ years old **Date of birth :** \_\_\_\_\_ year \_\_\_\_\_ month \_\_\_\_\_ da

**Address**

\_\_\_\_\_

### **Q1-1. How would you describe the state of your teeth and gums?**

1. Good    2. Fairly good    3. Average    4. Not so good    5. Poor

### **Q1-2 Do you have any concerns about the condition of your teeth and mouth?**

1. Chewing    2. Appearance    3. Speech    4. Halitosis  
5. Pain (Please choose one→ Teeth, Gums, Tongue, Others.)    6. Denture is not good  
7. Difficulty swallowing    8. Dry mouth    9. Interruption of dental treatment  
10. Jaw joint    11. Teeth alignment    12. Others    13. No particular problem

### **Q2-1 How would you describe the state of your overall health?**

1. Good    2. Fairly good    3. Average    4. Not so good    5. Poor

### **Q2-2: Do you have any of the following symptoms at present?**

**Please circle all that apply.**

1. Shoulder pain    2. Back pain    3. Elbow or hand pain    4. Foot pain  
5. Neuralgia    6. Tinnitus    7. Hearing loss    8. Blurred vision  
9. Insomnia    10. Other (symptoms: \_\_\_\_\_ )    11. Nothing in particular

### **Q2-3 I would like to ask about your health.**

#### **①Do you currently receive treatment for any of the following diseases?**

(Circle all that apply)

1. Diabetes    2. Stroke    3. Heart disease    4. Cancer    5. Pneumonia  
6. Hypertension    7. Hyperlipidemia    8. Obesity    9. Dementia  
10. Chronic occlusive pulmonary disease    11. Other ( \_\_\_\_\_ )  
12. No particular disease

#### **②Have you ever had a disease in the past for which you are not currently receiving treatment? (Circle all that apply)**

1. Diabetes    2. Stroke    3. Heart disease    4. Cancer    5. Pneumonia  
6. Hypertension    7. Hyperlipidemia    8. Obesity    9. Dementia  
10. Chronic occlusive pulmonary disease    11. Other ( \_\_\_\_\_ )  
12. No particular disease

**③Have you ever been diagnosed with any diseases that are not treated now, but were pointed out in your medical checkup?**

- |                                                            |                   |                  |             |              |
|------------------------------------------------------------|-------------------|------------------|-------------|--------------|
| 1. Diabetes                                                | 2. Stroke         | 3. Heart disease | 4. Cancer   | 5. Pneumonia |
| 6. Hypertension                                            | 7. Hyperlipidemia | 8. Obesity       | 9. Dementia |              |
| 10. Chronic occlusive pulmonary disease                    | 11. Other (       | )                |             |              |
| 12. No particular disease                                  |                   |                  |             |              |
| 13. I don't know, because I haven't had a medical checkup. |                   |                  |             |              |

**Q2-4 Have you been certified for nursing care?** (If you are in the process of applying, please indicate your current certification status.)

- |                           |                           |                           |
|---------------------------|---------------------------|---------------------------|
| 1. No                     | 2. Requiring help 1       | 3. Requiring help 2       |
| 4. Long-term care level 1 | 5. Long-term care level 2 | 6. Long-term care level 3 |
| 7. Long-term care level 4 | 8. Long-term care level 5 |                           |

**Q2-5 Because of the state of your teeth or mouth, how often have you any problems with your work during the past year?**

- |       |                 |              |           |
|-------|-----------------|--------------|-----------|
| 1. No | 2. Occasionally | 3. Sometimes | 4. Often. |
|-------|-----------------|--------------|-----------|

**Q2-6 Because of the state of your teeth or mouth, how often have you interrupt your sleep during the past year?**

- |       |                 |              |           |
|-------|-----------------|--------------|-----------|
| 1. No | 2. Occasionally | 3. Sometimes | 4. Often. |
|-------|-----------------|--------------|-----------|

**Q3-1. How many teeth do you have?** (Crown (gold or silver teeth), false teeth, and teeth with only the roots remaining are included in the number of teeth. If you have all your teeth, you have 28-32 teeth (there are up to 4 individual differences in the number of wisdom teeth).

**Number of teeth :** ( ) teeth

**Q3-2. Please tell us about your use of dentures.**

- |                                                  |              |             |
|--------------------------------------------------|--------------|-------------|
| (1) Do you have any removable partial dentures?  |              |             |
| 1. Upper jaw                                     | 2. Lower jaw | 3. Not used |
| (2) Do you have any removable complete dentures? |              |             |
| 1. Upper jaw                                     | 2. Lower jaw | 3. Not used |

**Q4. Can you chew your right and left back teeth firmly with your own teeth or dentures?**

- |                              |             |                              |
|------------------------------|-------------|------------------------------|
| 1. Both left and right teeth | 2. One side | 3. Neither of side can chew. |
|------------------------------|-------------|------------------------------|

**Q5. How often do your teeth bleed when you brush them?**

- |           |              |       |
|-----------|--------------|-------|
| 1. Always | 2. Sometimes | 3. No |
|-----------|--------------|-------|

**Q6. How often do you feel your gums swollen?**

- |           |              |       |
|-----------|--------------|-------|
| 1. Always | 2. Sometimes | 3. No |
|-----------|--------------|-------|

**Q7. How often do you feel your teeth sensitive to cold or hot foods?**

- |           |              |       |
|-----------|--------------|-------|
| 1. Always | 2. Sometimes | 3. No |
|-----------|--------------|-------|

**Q8. Do you have a dental office that you visit regularly?**

- |        |       |
|--------|-------|
| 1. Yes | 2. No |
|--------|-------|

**Q9. Do you have difficulty going to the dentist because of your work?**

1. Yes      2. No

**Q10. Are your family members or other people around you interested in oral health?**

1. Yes      2. Neither      3. No

**Q11. Do you have confidence in your teeth or have you ever been praised by others?**

1. Yes      2. Neither      3. No

**Q12. How often do you brush your teeth at work or when you go out?**

1. Every time      2. Sometimes      3. Never

**Q13. How often do you have snacks (sweet foods and drinks)?**

1. Every time      2. Sometimes      3. Never

**Q14. Please tell us about your daily habits.**

① **Tobacco**

1. Current smoking      2. Ex-smoking      3. Never

② **Alcohol**

1. Every day      2. At least once a week      3. Less than once a week  
4. Quit drinking      5. Never

③ **Exercise habits**

1. Every day      2. Several times a week  
3. Several times a month      4. Less than once a month

④ **Vegetable intake**

1. At least twice a day      2. At least once a day  
3. Several times a week      4. Less than once a week

**Q15-1. How often do you clean your teeth?**

1. 3 times or more a day      2. Twice a day      3. Once a day  
4. Less than a few times a week      5. Never

**Q15-2. How often do you clean your teeth at night before going to bed?**

1. Every day      2. Sometimes      3. Never

**Q15-3. Do you use toothpaste when you brush your teeth?**

1. Fluoride toothpaste      2. Non-fluoride toothpaste.  
3. I don't know if it contains fluoride, but I use toothpaste.      4. Never

**Q16. How often do you use an interdental brush or floss (thread toothpick)?**

1. Every day      2. Sometimes      3. Never

**Q17. How often do you chew your food slowly and well?**

1. Every day      2. Sometimes      3. Never

**Q18. What is the reason for your visit to the dental clinic?**

1. For treatment      2. For regular checkup      3. Treatment and regular checkup

**Q19. Have you visited a dentist in the past?**

1. Yes                      2.No

**[If you answered yes to Q19, please answer the following questions.]**

**Q19-1. When was the last time you went to the dentist?**

1. Within 3 months              2. Within 6 months              3. Within 1 year    4. Within 2 years  
5. Within 3 years              6. Within 5 years              7. More than 5 years ago

**Q19-2. What is the reason for your visit to the dental clinic for last time?**

1. For treatment              2.For regular checkup              3.Treatment and regular checkup

**[If you answered 2 or 3 to Q19-2, please answer the following questions.]**

**Q19-3. How often do you have regular checkups?**

1. Once in 6 months                                              2. Once within 1 year  
3. Once every two to three years                                              4. Other than that

**Q20: Have you ever received tooth brushing instruction at a dentist's office?**

1. Yes                      2.No

**Q21: Do you have anyone who can help you when you are in trouble? Please select all that apply.**

1. Family              2. Friends              3. Colleagues at work              4. Neighbors  
5. Members of a hobby or volunteer group              6. Others              7. No one

**Q22-1: Do you work now?**

1. I am working                                              2. I am not working

**[If you answered "1. I am working" to Q22-1, please answer the following questions.]**

**Q22-2: What is your occupation?**

1. Manager/ Director                                              2. Full-time employee (manager)  
3. Full-time employees (general employees)                                              4. Part-time employees  
5. Dispatched workers, contract workers, temporary employees  
6. Self-employed, freelancer                                              7. Others (                                              )

**Q22-3: Which of the following types of work do you do?**

1. Professional and technical occupations              2. Managerial occupations  
3. Clerical and sales occupations              4. Sales and service occupations  
5. Security occupations              6. Labor and factory work occupations  
7. Agriculture, forestry, and fishing              8.Others (                                              )

**Q23. Please circle the answer that best describes your family's current economic status, assuming that the average family is in the "middle" category.**

**Please be sure to state your own subjective opinion.**

1. Upper    2. Upper middle    3. Middle    4. Lower middle    5. Lower

**Q24: How many years have you been attending school? (Please count from the time you entered elementary school.)**

1. 9 years or less    2. 10 to 12 years    3. 13 to 15 years    4. 16 years or more

**Q25: Please fill in your height and weight.**

Height \_\_\_\_\_ cm, Weight \_\_\_\_\_ kg

**Thank you very much for your cooperation.**
