# Supplementary material for: Multilevel Analysis of the Association of Dental-Hygienist-Related Factors on Regular Dental Check-Up Behavior
Source: Int J Environ Res Public Health. 2021 Mar 10;18(6):2816. doi: 10.3390/ijerph18062816 (PMC7998093; doi:10.3390/ijerph18062816)
Supplement: Supplementary file 1 [file ijerph-18-02816-s001.zip › ijerph-1118612_supplementtable0309.pdf]

Supplemental Table S1. Characteristics of participants by the reason for dental visit

|                                                    | Treatment<br>N=5,734(47.2%) |      | Dental check-ups<br>N=6,405(52.8%) |      | p-value |
|----------------------------------------------------|-----------------------------|------|------------------------------------|------|---------|
|                                                    | N                           | %    | N                                  | %    | P       |
| Dental units dedicated to dental hygienists        |                             |      |                                    |      |         |
| None                                               | 4,480                       | 49.7 | 4,542                              | 50.3 | p<0.01  |
| ≥ 1 dental unit                                    | 1,254                       | 40.2 | 1,863                              | 59.8 |         |
| The time spent on oral health educations           |                             |      |                                    |      |         |
| 0 minute                                           | 1,181                       | 56.2 | 919                                | 43.8 | p<0.01  |
| 1-9 minutes                                        | 1,906                       | 47.5 | 2,108                              | 52.5 |         |
| 10-19 minutes                                      | 1,767                       | 44.8 | 2,178                              | 55.2 |         |
| 20 minutes or more                                 | 880                         | 42.3 | 1,200                              | 57.7 |         |
| Number of dental hygienists (full time equivalent) |                             |      |                                    |      |         |
| 0 person                                           | 881                         | 64.3 | 489                                | 35.7 | p<0.01  |
| <0 - 0.9                                           | 1,450                       | 57.3 | 1,079                              | 42.7 |         |
| 1 - 1.9                                            | 1,307                       | 48.3 | 1,397                              | 51.7 |         |
| 2 - 2.9                                            | 1,006                       | 41.9 | 1,397                              | 58.1 |         |
| 3 people or more                                   | 1,091                       | 34.8 | 2,043                              | 65.2 |         |
| Number of dentists (full time equivalent)          |                             |      |                                    |      |         |
| 1 person                                           | 3,645                       | 50.8 | 3,525                              | 49.2 | p<0.01  |
| <1-1.9                                             | 1,450                       | 42.8 | 1,935                              | 57.2 |         |
| 2 people or more                                   | 639                         | 40.3 | 945                                | 59.7 |         |
| Sex                                                |                             |      |                                    |      |         |
| Male                                               | 2,288                       | 52.8 | 2,043                              | 47.2 | p<0.01  |
| Female                                             | 3,446                       | 44.1 | 4,362                              | 55.9 |         |
| Age(years)                                         |                             |      |                                    |      |         |
| 20-29                                              | 453                         | 46.4 | 523                                | 53.6 | p<0.01  |
| 30-39                                              | 689                         | 46.0 | 809                                | 54.0 |         |
| 40-49                                              | 895                         | 47.5 | 988                                | 52.5 |         |
| 50-59                                              | 1,016                       | 48.9 | 1,062                              | 51.1 |         |
| 60-69                                              | 1,317                       | 45.5 | 1,575                              | 54.5 |         |
| 70-79                                              | 1,069                       | 47.7 | 1,173                              | 52.3 |         |
| 80-89                                              | 279                         | 51.1 | 267                                | 48.9 |         |
| 90+                                                | 16                          | 66.7 | 8                                  | 33.3 |         |
| Subjective economic status                         |                             |      |                                    |      |         |
| Low                                                | 1,277                       | 53.1 | 1,129                              | 46.9 | p<0.01  |
| Middle                                             | 3,796                       | 46.7 | 4,339                              | 53.3 |         |
| High                                               | 662                         | 41.4 | 937                                | 58.6 |         |
| Years of education                                 |                             |      |                                    |      |         |
| ≤9                                                 | 579                         | 57.7 | 424                                | 42.3 | p<0.01  |
| 10-12                                              | 2,551                       | 49.5 | 2,605                              | 50.5 |         |
| 14-15                                              | 1,553                       | 43.7 | 1,997                              | 56.3 |         |
| ≥16                                                | 1,052                       | 43.3 | 1,378                              | 56.7 |         |

Supplemental Table S2. Prevalence ratio(PR), Median prevalence ratio, and variance partition coefficient for regular dental check-ups.\*

|                                                           | Crude  |             | Model 1 |             | Model 2 |             | Model 3 |             | Model 4 |             |
|-----------------------------------------------------------|--------|-------------|---------|-------------|---------|-------------|---------|-------------|---------|-------------|
|                                                           | PR     | 95%CI       | PR      | 95%CI       | PR      | 95%CI       | PR      | 95%CI       | PR      | 95%CI       |
| <b>Fixed-effects</b>                                      |        |             |         |             |         |             |         |             |         |             |
| <b>Dental units dedicated to dental hygienists</b>        |        |             |         |             |         |             |         |             |         |             |
| None                                                      | 1.00   |             | 1.00    |             |         |             |         |             | 1.00    |             |
| 1 dental unit or more                                     | 1.19   | 1.11 - 1.28 | 1.15    | 1.08 - 1.23 |         |             |         |             | 1.11    | 1.04 - 1.18 |
| <b>The time spent on oral health educations</b>           |        |             |         |             |         |             |         |             |         |             |
| 0 minute                                                  | 1.00   |             |         |             | 1.00    |             |         |             | 1.00    |             |
| 1-9 minutes                                               | 1.19   | 1.07 - 1.32 |         |             | 1.14    | 1.03 - 1.26 |         |             | 1.10    | 0.99 - 1.22 |
| 10-19 minutes                                             | 1.26   | 1.14 - 1.40 |         |             | 1.19    | 1.08 - 1.32 |         |             | 1.11    | 1.00 - 1.23 |
| 20 minutes or more                                        | 1.33   | 1.20 - 1.49 |         |             | 1.26    | 1.14 - 1.39 |         |             | 1.15    | 1.04 - 1.28 |
| <b>Number of dental hygienists (full time equivalent)</b> |        |             |         |             |         |             |         |             |         |             |
| 0 person                                                  | 1.00   |             |         |             |         |             | 1.00    |             | 1.00    |             |
| <0 - 0.9                                                  | 1.20   | 1.05 - 1.36 |         |             |         |             | 1.20    | 1.06 - 1.37 | 1.17    | 1.02 - 1.34 |
| 1 - 1.9                                                   | 1.45   | 1.25 - 1.69 |         |             |         |             | 1.43    | 1.24 - 1.66 | 1.38    | 1.18 - 1.61 |
| 2 - 2.9                                                   | 1.62   | 1.39 - 1.89 |         |             |         |             | 1.60    | 1.38 - 1.86 | 1.55    | 1.33 - 1.81 |
| 3 people or more                                          | 1.88   | 1.61 - 2.21 |         |             |         |             | 1.84    | 1.56 - 2.16 | 1.76    | 1.49 - 2.09 |
| <b>Number of dentists (full time equivalent)</b>          |        |             |         |             |         |             |         |             |         |             |
| 1 person                                                  | 1.00   |             | 1.00    |             | 1.00    |             | 1.00    |             | 1.00    |             |
| <1-1.9                                                    | 1.14   | 1.05 - 1.23 | 1.11    | 1.04 - 1.20 | 1.10    | 1.02 - 1.18 | 1.04    | 0.97 - 1.11 | 1.03    | 0.96 - 1.11 |
| 2 people or more                                          | 1.21   | 1.09 - 1.34 | 1.15    | 1.04 - 1.26 | 1.14    | 1.03 - 1.26 | 0.99    | 0.89 - 1.09 | 0.95    | 0.87 - 1.05 |
| <b>Sex</b>                                                |        |             |         |             |         |             |         |             |         |             |
| Male                                                      | 1.00   |             | 1.00    |             | 1.00    |             | 1.00    |             | 1.00    |             |
| Female                                                    | 1.18   | 1.13 - 1.24 | 1.17    | 1.13 - 1.22 | 1.17    | 1.13 - 1.22 | 1.17    | 1.13 - 1.22 | 1.17    | 1.13 - 1.22 |
| <b>Age (years)</b>                                        |        |             |         |             |         |             |         |             |         |             |
| 20-29                                                     | 1.00   |             | 1.00    |             | 1.00    |             | 1.00    |             | 1.00    |             |
| 30-39                                                     | 1.00   | 0.92 - 1.10 | 1.01    | 0.93 - 1.09 | 1.01    | 0.93 - 1.10 | 1.00    | 0.92 - 1.09 | 1.00    | 0.92 - 1.09 |
| 40-49                                                     | 0.98   | 0.91 - 1.05 | 1.00    | 0.93 - 1.07 | 1.00    | 0.93 - 1.07 | 0.99    | 0.92 - 1.07 | 1.00    | 0.93 - 1.07 |
| 50-59                                                     | 0.96   | 0.87 - 1.04 | 0.98    | 0.90 - 1.07 | 0.98    | 0.90 - 1.07 | 0.99    | 0.90 - 1.08 | 0.98    | 0.90 - 1.08 |
| 60-69                                                     | 1.01   | 0.92 - 1.11 | 1.06    | 0.97 - 1.15 | 1.06    | 0.98 - 1.15 | 1.07    | 0.98 - 1.17 | 1.07    | 0.98 - 1.16 |
| 70-79                                                     | 0.97   | 0.87 - 1.07 | 1.05    | 0.96 - 1.15 | 1.05    | 0.96 - 1.15 | 1.07    | 0.97 - 1.17 | 1.07    | 0.97 - 1.17 |
| 80-89                                                     | 0.91   | 0.81 - 1.01 | 1.03    | 0.93 - 1.14 | 1.03    | 0.93 - 1.14 | 1.06    | 0.96 - 1.17 | 1.06    | 0.96 - 1.17 |
| 90+                                                       | 0.63   | 0.35 - 1.13 | 0.84    | 0.48 - 1.45 | 0.84    | 0.49 - 1.45 | 0.85    | 0.50 - 1.46 | 0.86    | 0.50 - 1.47 |
| <b>Subjective economic status</b>                         |        |             |         |             |         |             |         |             |         |             |
| Low                                                       | 1.00   |             | 1.00    |             | 1.00    |             | 1.00    |             | 1.00    |             |
| Middle                                                    | 1.13   | 1.07 - 1.19 | 1.09    | 1.04 - 1.14 | 1.09    | 1.04 - 1.14 | 1.08    | 1.03 - 1.13 | 1.08    | 1.03 - 1.13 |
| High                                                      | 1.23   | 1.14 - 1.32 | 1.15    | 1.08 - 1.24 | 1.15    | 1.07 - 1.23 | 1.15    | 1.07 - 1.23 | 1.14    | 1.07 - 1.22 |
| <b>Years of education</b>                                 |        |             |         |             |         |             |         |             |         |             |
| ≤9                                                        | 1.00   |             | 1.00    |             | 1.00    |             | 1.00    |             | 1.00    |             |
| 10-12                                                     | 1.19   | 1.09 - 1.29 | 1.13    | 1.04 - 1.23 | 1.13    | 1.04 - 1.23 | 1.13    | 1.05 - 1.23 | 1.14    | 1.05 - 1.23 |
| 14-15                                                     | 1.31   | 1.20 - 1.43 | 1.22    | 1.13 - 1.32 | 1.22    | 1.13 - 1.32 | 1.22    | 1.13 - 1.32 | 1.22    | 1.13 - 1.32 |
| ≥16                                                       | 1.32   | 1.21 - 1.44 | 1.27    | 1.17 - 1.38 | 1.27    | 1.17 - 1.38 | 1.27    | 1.17 - 1.38 | 1.28    | 1.18 - 1.39 |
| <b>Random effects (SE)</b>                                |        |             |         |             |         |             |         |             |         |             |
| Prefecture                                                | 0.02** | (0.01)      | 0.01    | (0.01)      | 0.01    | (0.00)      | 0.02    | (0.00)      | 0.02    | (0.00)      |
| Dental clinic                                             | 0.12** | (0.02)      | 0.10    | (0.01)      | 0.09    | (0.01)      | 0.07    | (0.01)      | 0.06    | (0.01)      |
| <b>Median prevalence ratio (MPR)</b>                      |        |             |         |             |         |             |         |             |         |             |
| Prefecture                                                | 1.14** | 1.10 - 1.18 | 1.10    | 1.10 - 1.18 | 1.10    | 1.10 - 1.18 | 1.14    | 1.10 - 1.18 | 1.14    | 1.10 - 1.18 |
| Dental clinic                                             | 1.39** | 1.33 - 1.45 | 1.35    | 1.29 - 1.41 | 1.33    | 1.29 - 1.39 | 1.29    | 1.24 - 1.33 | 1.26    | 1.24 - 1.33 |
| <b>Variance partition coefficient(VPC)</b>                |        |             |         |             |         |             |         |             |         |             |
| Prefecture                                                | 0.6%** |             | 0.3%    |             | 0.3%    |             | 0.6%    |             | 0.6%    |             |
| Dental clinic                                             | 3.5%** |             | 2.9%    |             | 2.7%    |             | 2.1%    |             | 1.8%    |             |

\* The reason of dental visit were dichotomized as follows: (0) treatment and (1) regular check-ups, with or without treatment.

\*\*Random effects, MPR, and VPC for the null model; the model includes only a constant.
